# Supplementary material
Source: PubMed Central journal article supplement (PMC5789030)
Supplement: MCB.00476-17_zmb004181692s1.pdf [file MCB.00476-17_zmb004181692s1.pdf]

## Supplement

### Oligos used to generate templates for immobilized template pulldown

| Name                       | Sequence                                                           |
|----------------------------|--------------------------------------------------------------------|
| mRpS30_wtMotif1(+)         | ATCCAGCGTGCCGGTCACACTGCAGCAATGACATAACCTAGTTATTGTCAA/3InvdT/        |
| Biotin-mRpS30_wtMotif1(-)  | /5Biosg/TTGACAATAACTAGGTTATGTCATTGCTGCAGTGTGACCGCACGCTGGAT/3InvdT/ |
| mRpS30_mutMotif1(+)        | ATCCAGCGTGCCGGTCAGAGTGCAGCAATGACATAACCTAGTTATTGTCAA/3InvdT/        |
| Biotin-mRpS30_mutMotif1(-) | /5Biosg/TTGACAATAACTAGGTTATGTCATTGCTGCACCTGACGGCACGCTGGAT/3InvdT/  |
| RpLP1_wtMotif1(+)          | TTCGTCATCGGCGCGGTCACACTGCATATCAACTGCTCTTTCCGGTTTAG                 |
| Biotin-RpLP1_wtMotif1(-)   | /5Biosg/CTAAACCGGAAAGAGCAGTTGATATGCAGTGTGACCGCGCCGATGACGAA         |
| RpLP1_mutMotif1(+)         | TTCGTCATCGGCGCCGTCAGAGTGCATATCAACTGCTCTTTCCGGTTTAG                 |
| Biotin-RpLP1_mutMotif1(-)  | /5Biosg/CTAAACCGGAAAGAGCAGTTGATATGCACTCTGACGGCGCCGATGACGAA         |

### Primers to generate PCR template for dsRNA production

| Name                 | Sequence                                            |
|----------------------|-----------------------------------------------------|
| lacZ RNAi Fwd        | GAATTAATACGACTCACTATAGGGAGATGAAAGCTGGCTACAGGA       |
| lacZ RNAi Rev        | GAATTAATACGACTCACTATAGGGAGAGCAGGCTTCTGCTTCAAT       |
| GFZF RNAi Exon 2 Fwd | GAATTAATACGACTCACTATAGGGAGATCAGCATCTGTTCCTCCG       |
| GFZF RNAi Exon 2 Rev | GAATTAATACGACTCACTATAGGGAGAGTGTGTGAATGTGGGTCGAG     |
| GFZF RNAi 5'UTR Fwd  | GAATTAATACGACTCACTATAGGGAGAGCATAGCTCGCAGCCCTCGTATCC |
| GFZF RNAi 5'UTR Rev  | GAATTAATACGACTCACTATAGGGAGAGGCCCGAGCCCGAATTCAGC     |

### Primers used for qPCR analysis of ChIP material

| Name              | Sequence                  | Product Size | Flybase Gene Accession |
|-------------------|---------------------------|--------------|------------------------|
| RpLP1-Fwd (-10)   | ATCAACTGCTCTTTCCGGTT      | 78 bp        | FBgn0002593            |
| RpLP1-Rev (+68)   | TGTTTATAACAAATGGCCTTAGCTC |              |                        |
| awd-Fwd (-84)     | ATTCACCTTGCCGGCATTTC      | 125 bp       | FBgn0000150            |
| awd-Rev (+41)     | TCCTTGTTAGCCGCCATTGT      |              |                        |
| hsp70Bc-Fwd (-72) | GAGAGCGCGCCTCGAAT         | 101 bp       | FBgn0013279            |
| hsp70Bc-Rev (+29) | CGTGTTCACTTTGCTTGTGTTGAA  |              |                        |
| roX2-Fwd (-52)    | AGTGTGGCCAAAACCGAAAA      | 121 bp       | FBgn0019660            |
| roX2-Rev (+69)    | TTCGCTTACCTAAACGCTCG      |              |                        |
| sxl-Fwd (-56)     | TTAGCCACCGTAAAGCCACC      | 99 bp        | FBgn0264270            |
| sxl-Rev (+43)     | TTCAGTGGCGACTTTCCTT       |              |                        |

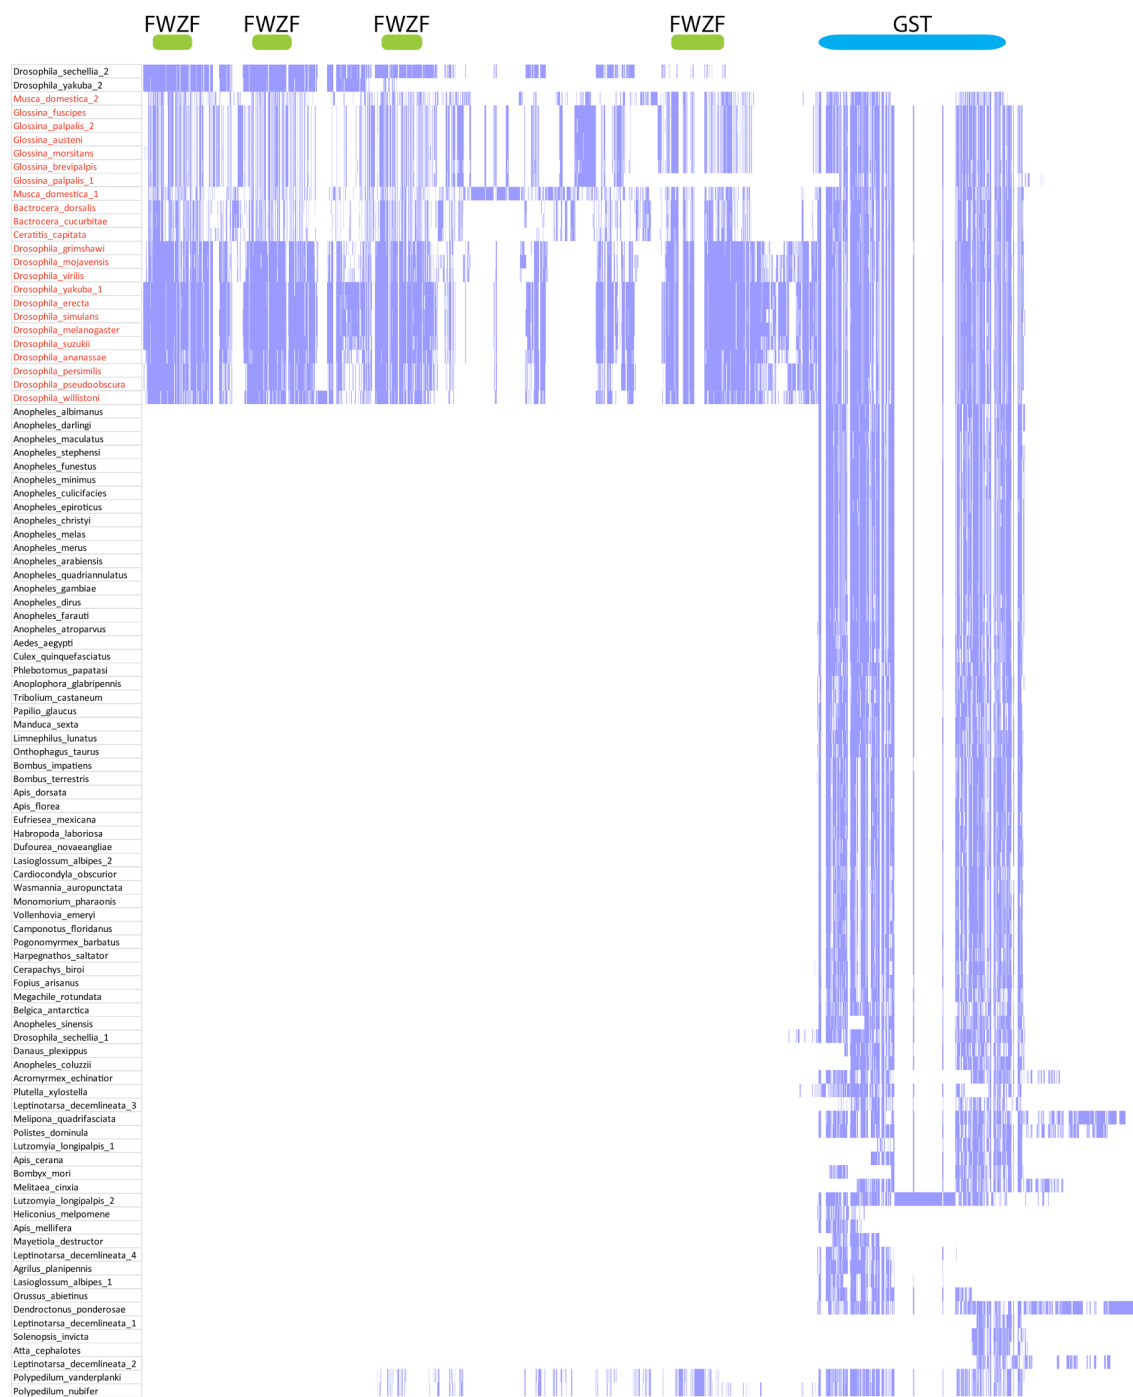

Supplemental Figure S1. Orthologs of the entirety of GFZF are restricted to Schizophora. GFZF orthologs and sequences were obtained from OrthoDB (1) by providing the amino acid sequence of GFZF. Sequence alignments were generated using Clustal Omega (2). The image was generated using Jalview with the “BLOSUM62” coloring mode (3). The FLYWCH zinc finger (FWZF) and GST domains are delineated above the alignments.

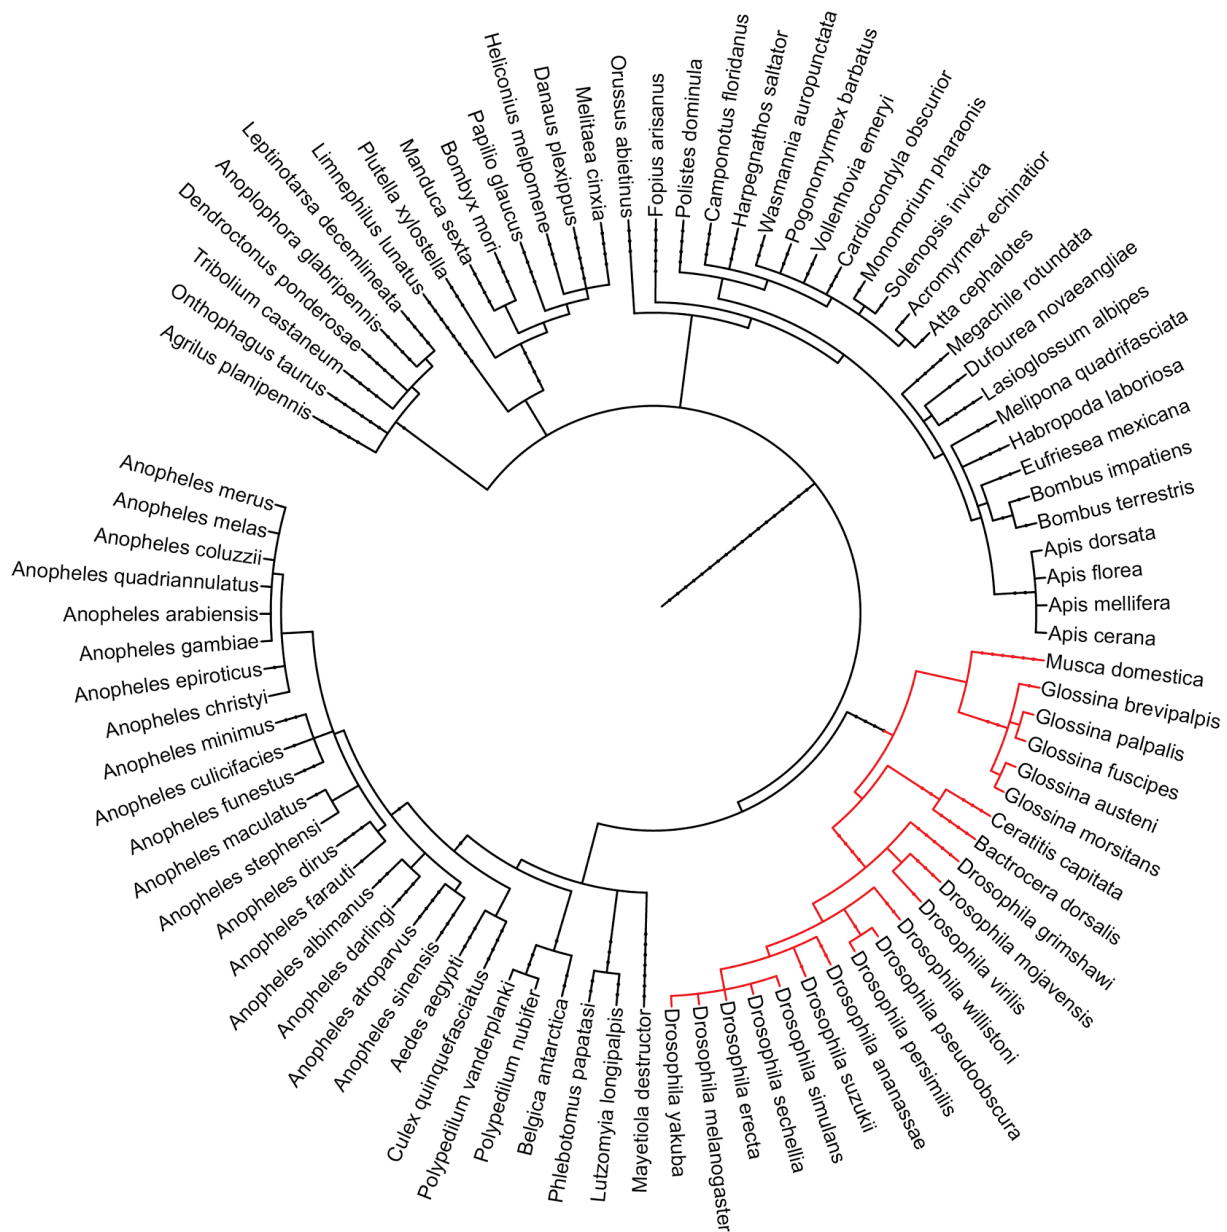

Supplemental Figure S2. Orthologs of the entirety of GFZF are restricted to Schizophora. Cladogram showing Schizophora cladogram was generated with Interactive Tree of Life (iTOL) server (4) by feeding the phyloT server with the list of organisms that possess GFZF orthologs according to OrthoDB as shown in Supplemental Figure S1. Species with orthologs possessing N-terminal FLYWCH zinc fingers, like GFZF, are highlighted in red.

## References

1. Zdobnov EM, Tegenfeldt F, Kuznetsov D, Waterhouse RM, Simão FA, Ioannidis P, Seppey M, Loetscher A, Kriventseva EV. 2017. OrthoDB v9.1: cataloging evolutionary and functional annotations for animal, fungal, plant, archaeal, bacterial and viral orthologs. *Nucleic Acids Res* 45:D744–D749.
2. Sievers F, Wilm A, Dineen D, Gibson TJ, Karplus K, Li W, Lopez R, McWilliam H, Remmert M, Söding J, Thompson JD, Higgins DG. 2011. Fast, scalable generation of high-quality protein multiple sequence alignments using Clustal Omega. *Mol Syst Biol* 7:539.
3. Waterhouse AM, Procter JB, Martin DMA, Clamp M, Barton GJ. 2009. Jalview Version 2--a multiple sequence alignment editor and analysis workbench. *Bioinformatics* 25:1189–1191.
4. Letunic I, Bork P. 2016. Interactive tree of life (iTOL) v3: an online tool for the display and annotation of phylogenetic and other trees. *Nucleic Acids Res* 44:W242–5.
